# Supplementary material for: Breakthrough in high ON-state current based on Ag–GeTe8 selectors
Source: Royal Society of Chemistry journal article supplement (doi:10.1039/c9tc06673j), 2020-01-01
Supplement: c9tc06673j1.pdf [file c9tc06673j1.pdf]

## Supplementary Information

### Breakthrough in High On-State Current Based on Ag-GeTe<sub>8</sub> Selectors

*Sifan Zhang,<sup>ac</sup> Liangcai Wu,<sup>\*ab</sup> Zhitang Song,<sup>\*a</sup> Tao Li,<sup>ac</sup> Xin Chen,<sup>a</sup> and Shuai Yan,<sup>ac</sup> Min Zhu<sup>a</sup>*

<sup>a</sup> State Key Laboratory of Functional Materials for Informatics, Shanghai Institute of Microsystem and Information Technology, Chinese Academy of Sciences, Shanghai 200050, China.

<sup>b</sup> College of Science, Donghua University, Shanghai 201620, China.

<sup>c</sup> University of the Chinese Academy of Sciences, Beijing 100049, China.

### Corresponding Author

Prof. *Liangcai Wu*, E-mail: lcwu@dhu.edu.cn.

Prof. *Zhitang Song*, E-mail: ztsong@mail.sim.ac.cn

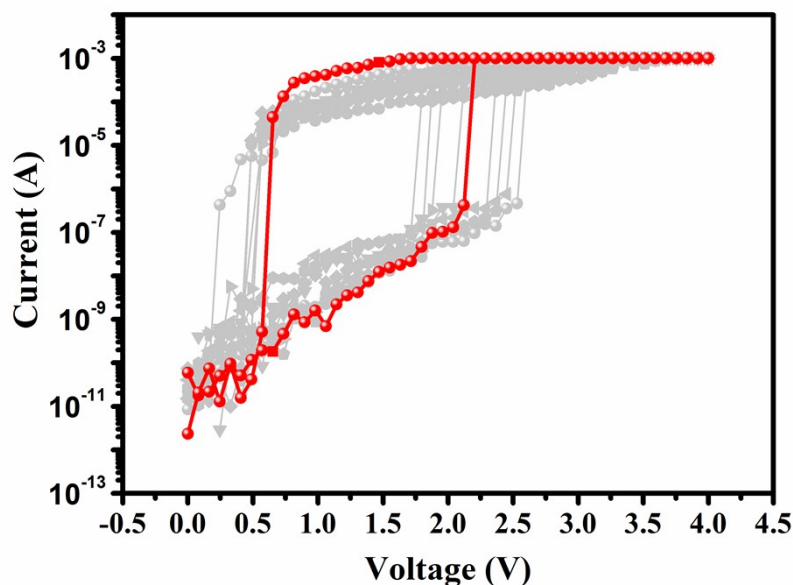

**Fig. S1** The I-V curves of Al/TiN/AgGeTe<sub>8</sub>/TiN/W device.

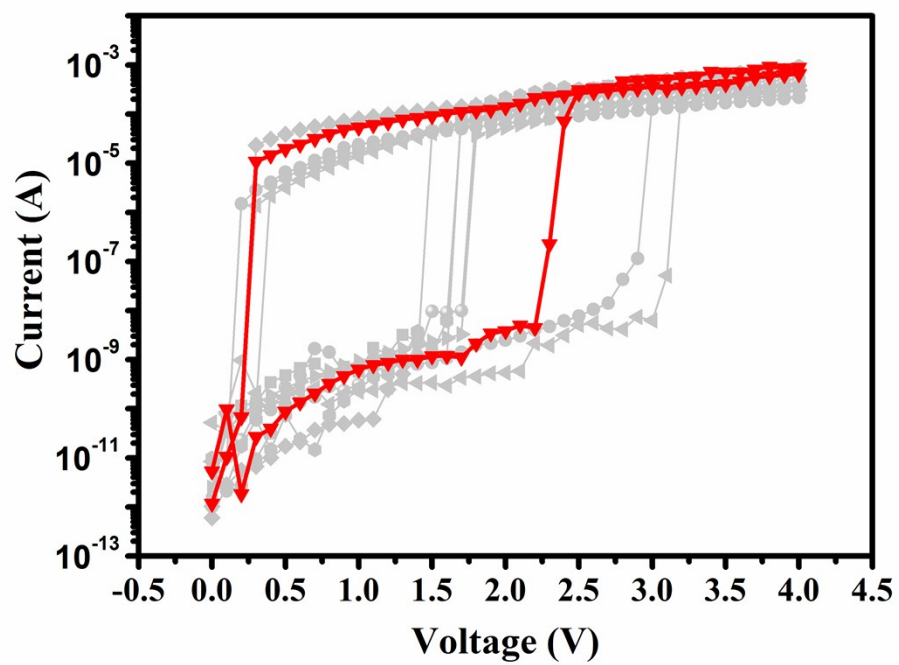

**Fig. S2** The I-V curves of Al/TiN/GeTe<sub>8</sub>/TiN/W device.

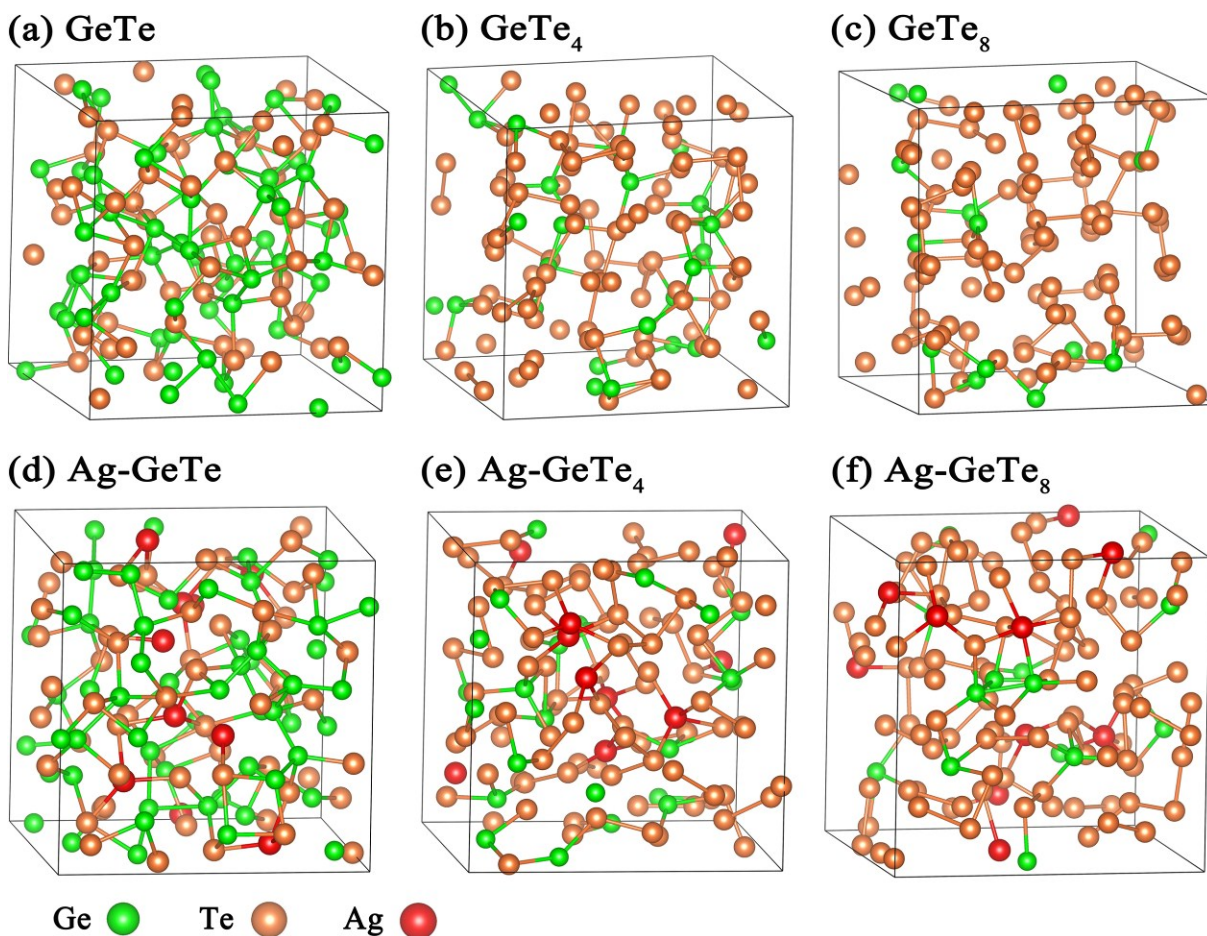

**Fig. S3** (a)-(c) The amorphous structure of GeTe<sub>x</sub>( $x=1, 4, 8$ ) at 300 K. (d)-(f) The amorphous structure of Ag-GeTe<sub>x</sub>( $x=1, 4, 8$ ) at 300 K.

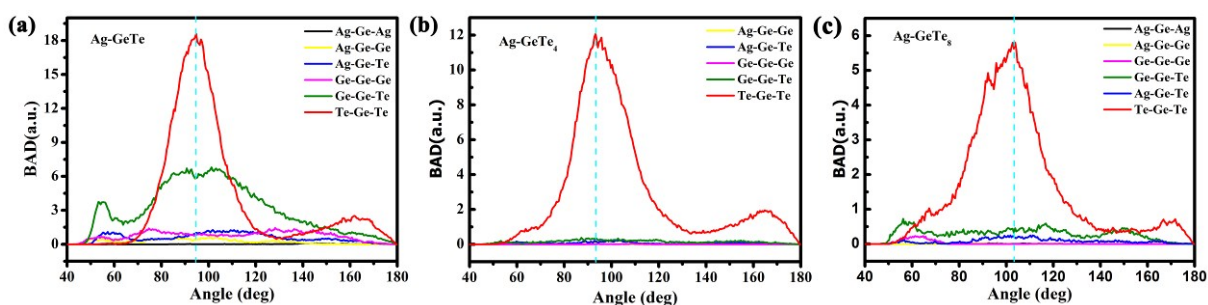

**Fig. S4** Details of the bond angle distributions around Ge in a) Ag-GeTe. b) Ag-GeTe<sub>4</sub>. c) Ag-GeTe<sub>8</sub>. The bond angle distribution around Ge is almost derived from the contribution of the bond angle distribution of Te-Ge-Te.

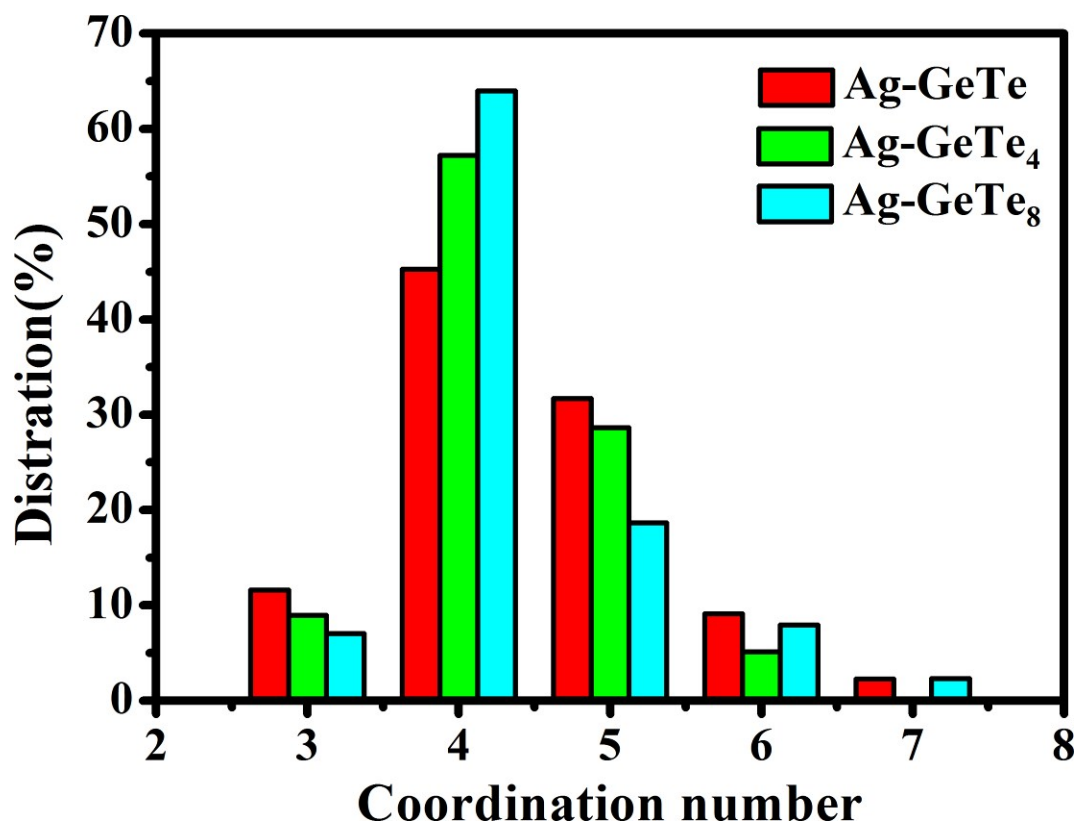

**Fig. S5** Coordination number distributions of Ge in Ag-GeTe, Ag-GeTe<sub>4</sub> and Ag-GeTe<sub>8</sub>. As the Te concentration increases, the proportion of four coordination number of Ge atoms increased from 45.3% to 57.2%, then to 64.0%, the five coordination number of Ge atoms decreased from 31.7% to 28.6%, then to 18.7%, and the six coordination number of Ge atoms decreased from 9.1% to 5.1%, then rose to 7.9%.
